# Supplementary material for: Proteomics Reveals How the Tardigrade Damage Suppressor Protein Teaches Transfected Human Cells to Survive UV-C Stress
Source: MDPI journal article supplement (doi:10.3390/ijms241411463), 2023-07-14

# Proteomics reveals how the tardigrade damage suppressor protein teaches transfected human cells how to struggle with UV-C stress

Enxhi Shaba<sup>1\*</sup>, Claudia Landi<sup>1\*§</sup>, Carlotta Marzocchi<sup>2</sup>, Lorenza Vantaggiato<sup>1</sup>, Luca Bini<sup>1</sup>, Claudia Ricci<sup>2^</sup> and Silvia Cantara<sup>2^</sup>

<sup>1</sup>Functional Proteomics Lab, Department of Life Sciences, University of Siena, 53100 Siena, Italy.

<sup>2</sup>Department of Medical, Surgical and Neurological Sciences, University of Siena, 53100 Siena, Italy.

\* co-first authors

^ co-last authors

**Supporting Information:** This article contains supporting information, as listed below:

**Figure S1:** Representative 2DE electropherograms of Dsup– vs Dsup+ HEK293T cells at basal condition;

**Figure S2:** Survival assay of HEK293T cells control (Dsup-) and Dsup-transfected (Dsup+) after 15” of UV-C exposure recovered after 24h. The dotted line represents the basal condition (100%)

**Figure S3:** Representative 2DE electropherograms of Dsup– vs Dsup+ HEK293T cells exposed to 15 seconds of UV-C radiation and recovered after 24h;

**Figure S4:** Dsup assessment. Dsup expression in control (Dsup–) and transfected (Dsup+) HEK293T cells was performed by endpoint PCR and visualized in 2% agarose gel by ethidium bromide;

**Figure S5:** MetaCore legend;

**Table S1:** Proteomic results of the Dsup– vs Dsup+ HEK293T cells analysis at basal condition

**Table S2:** Proteomic result of the Dsup– vs Dsup+ HEK293T cells analysis exposed to UV-C



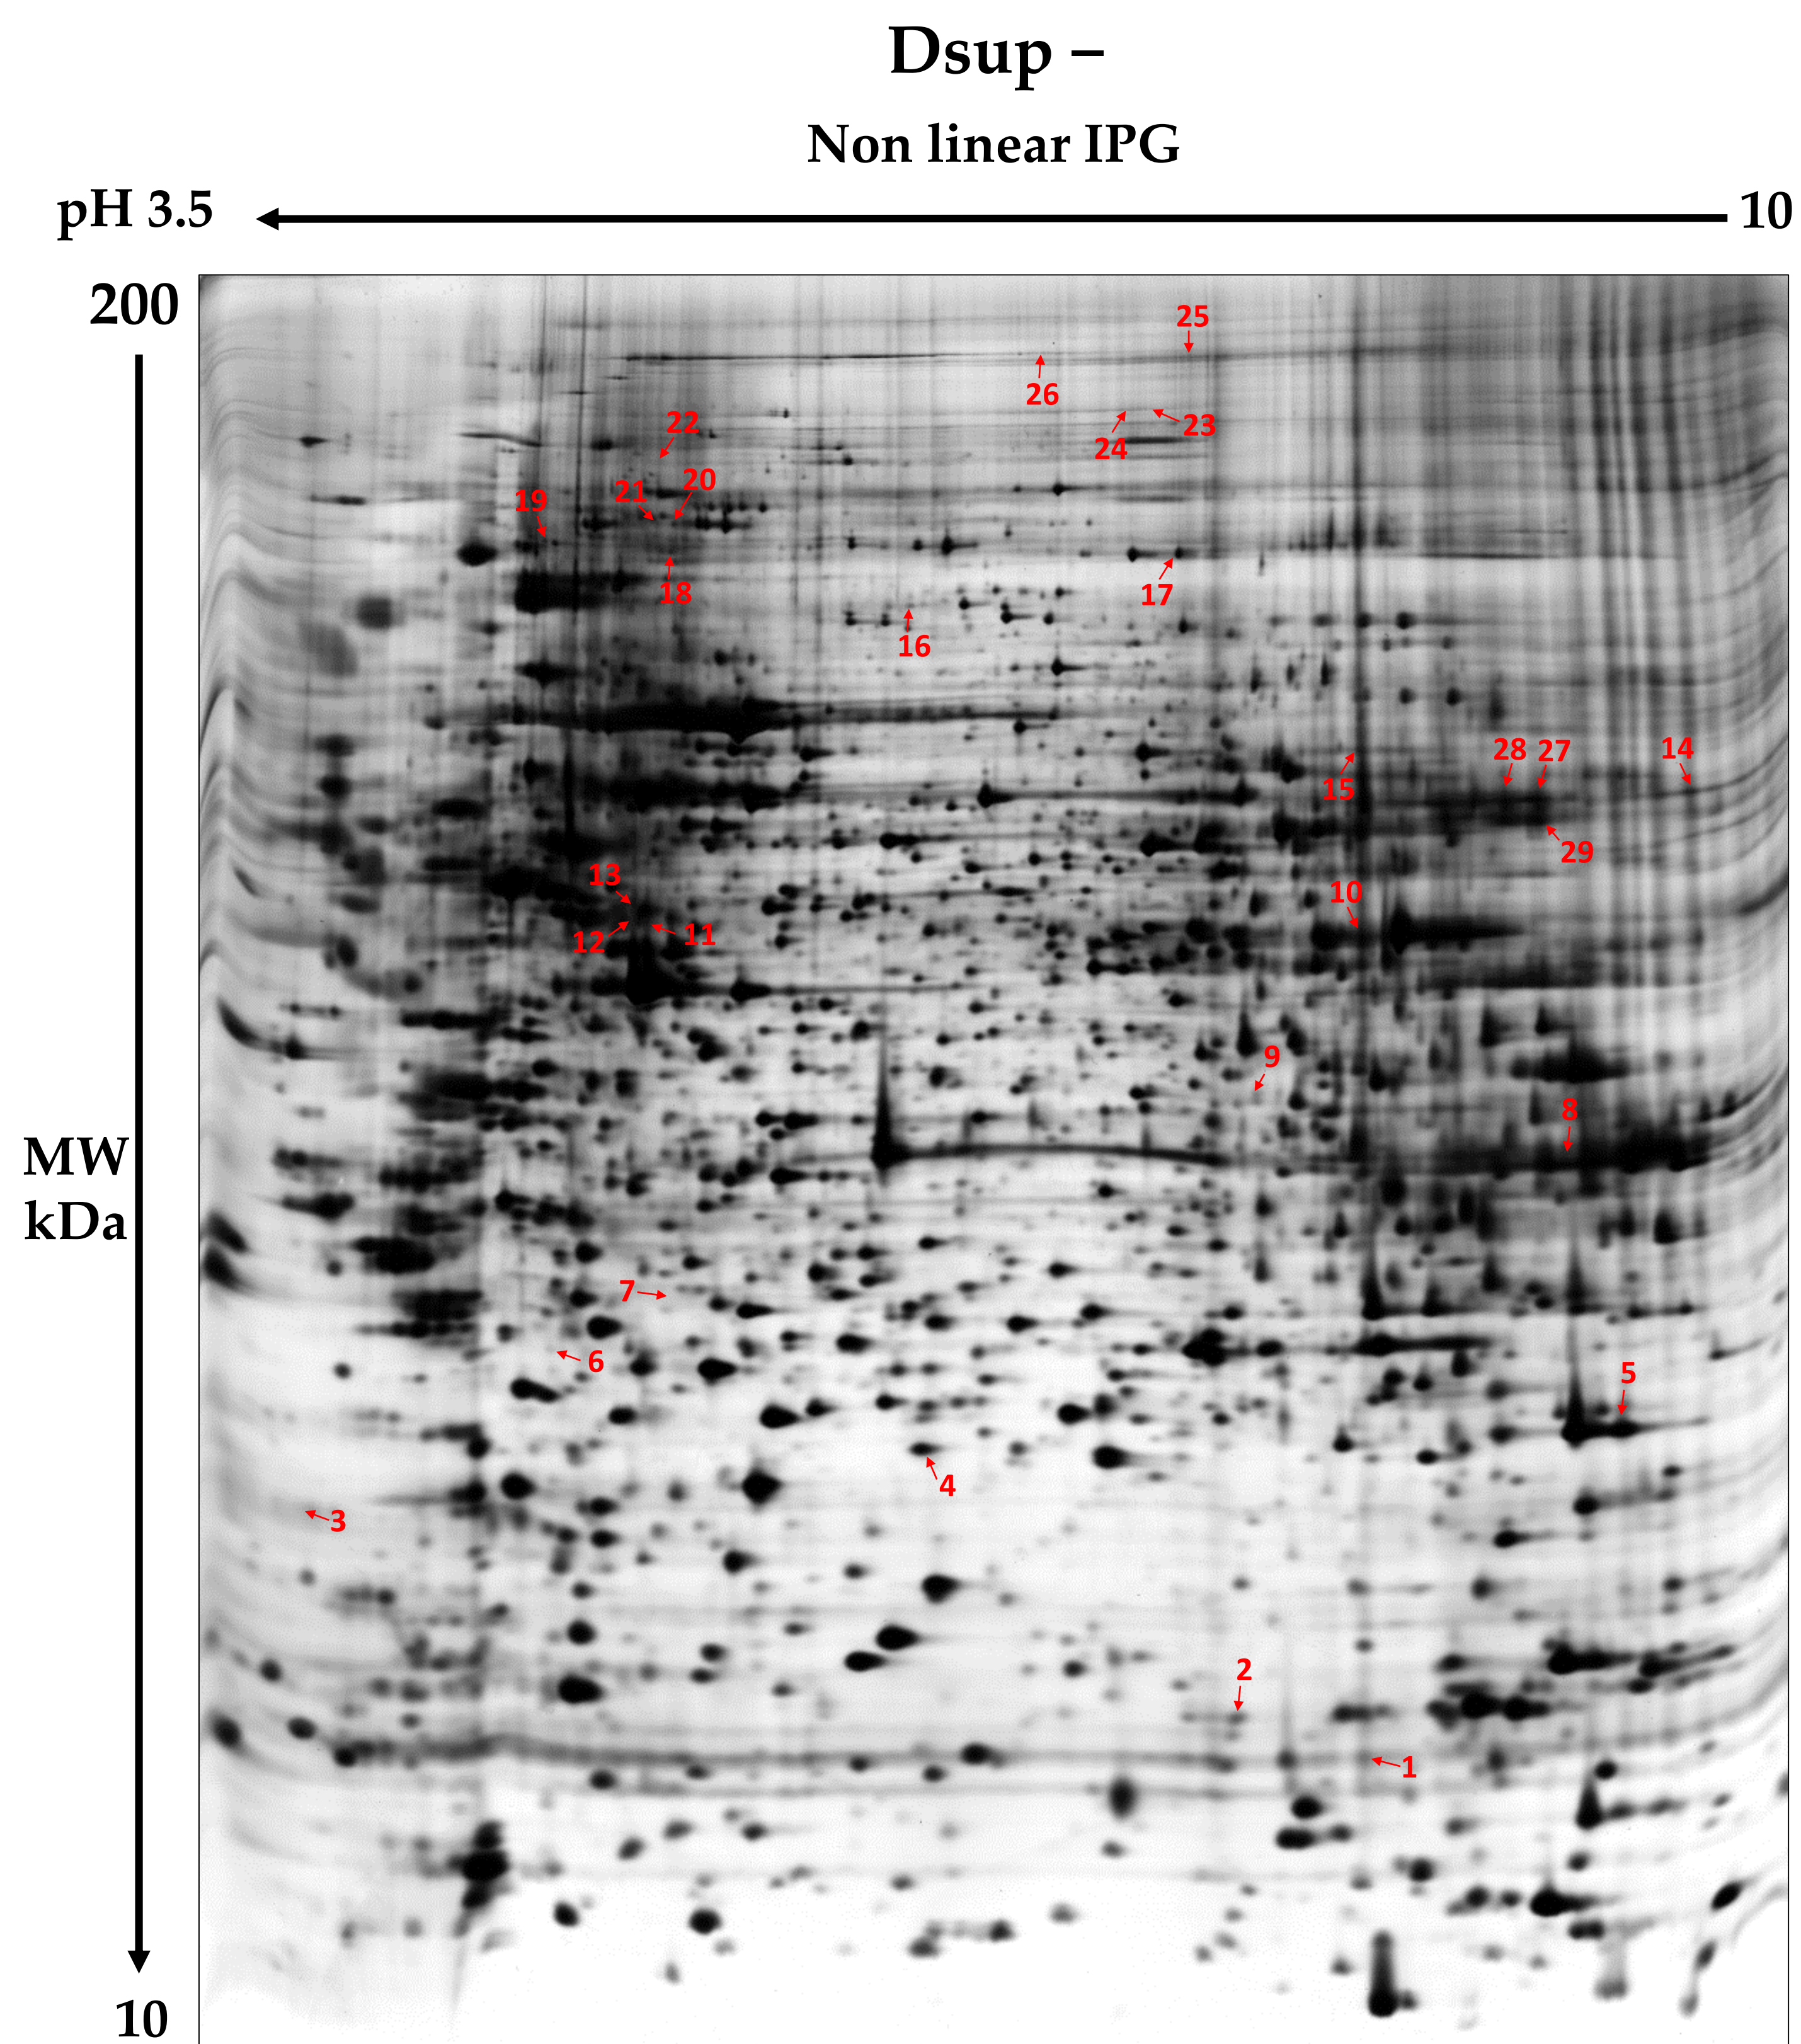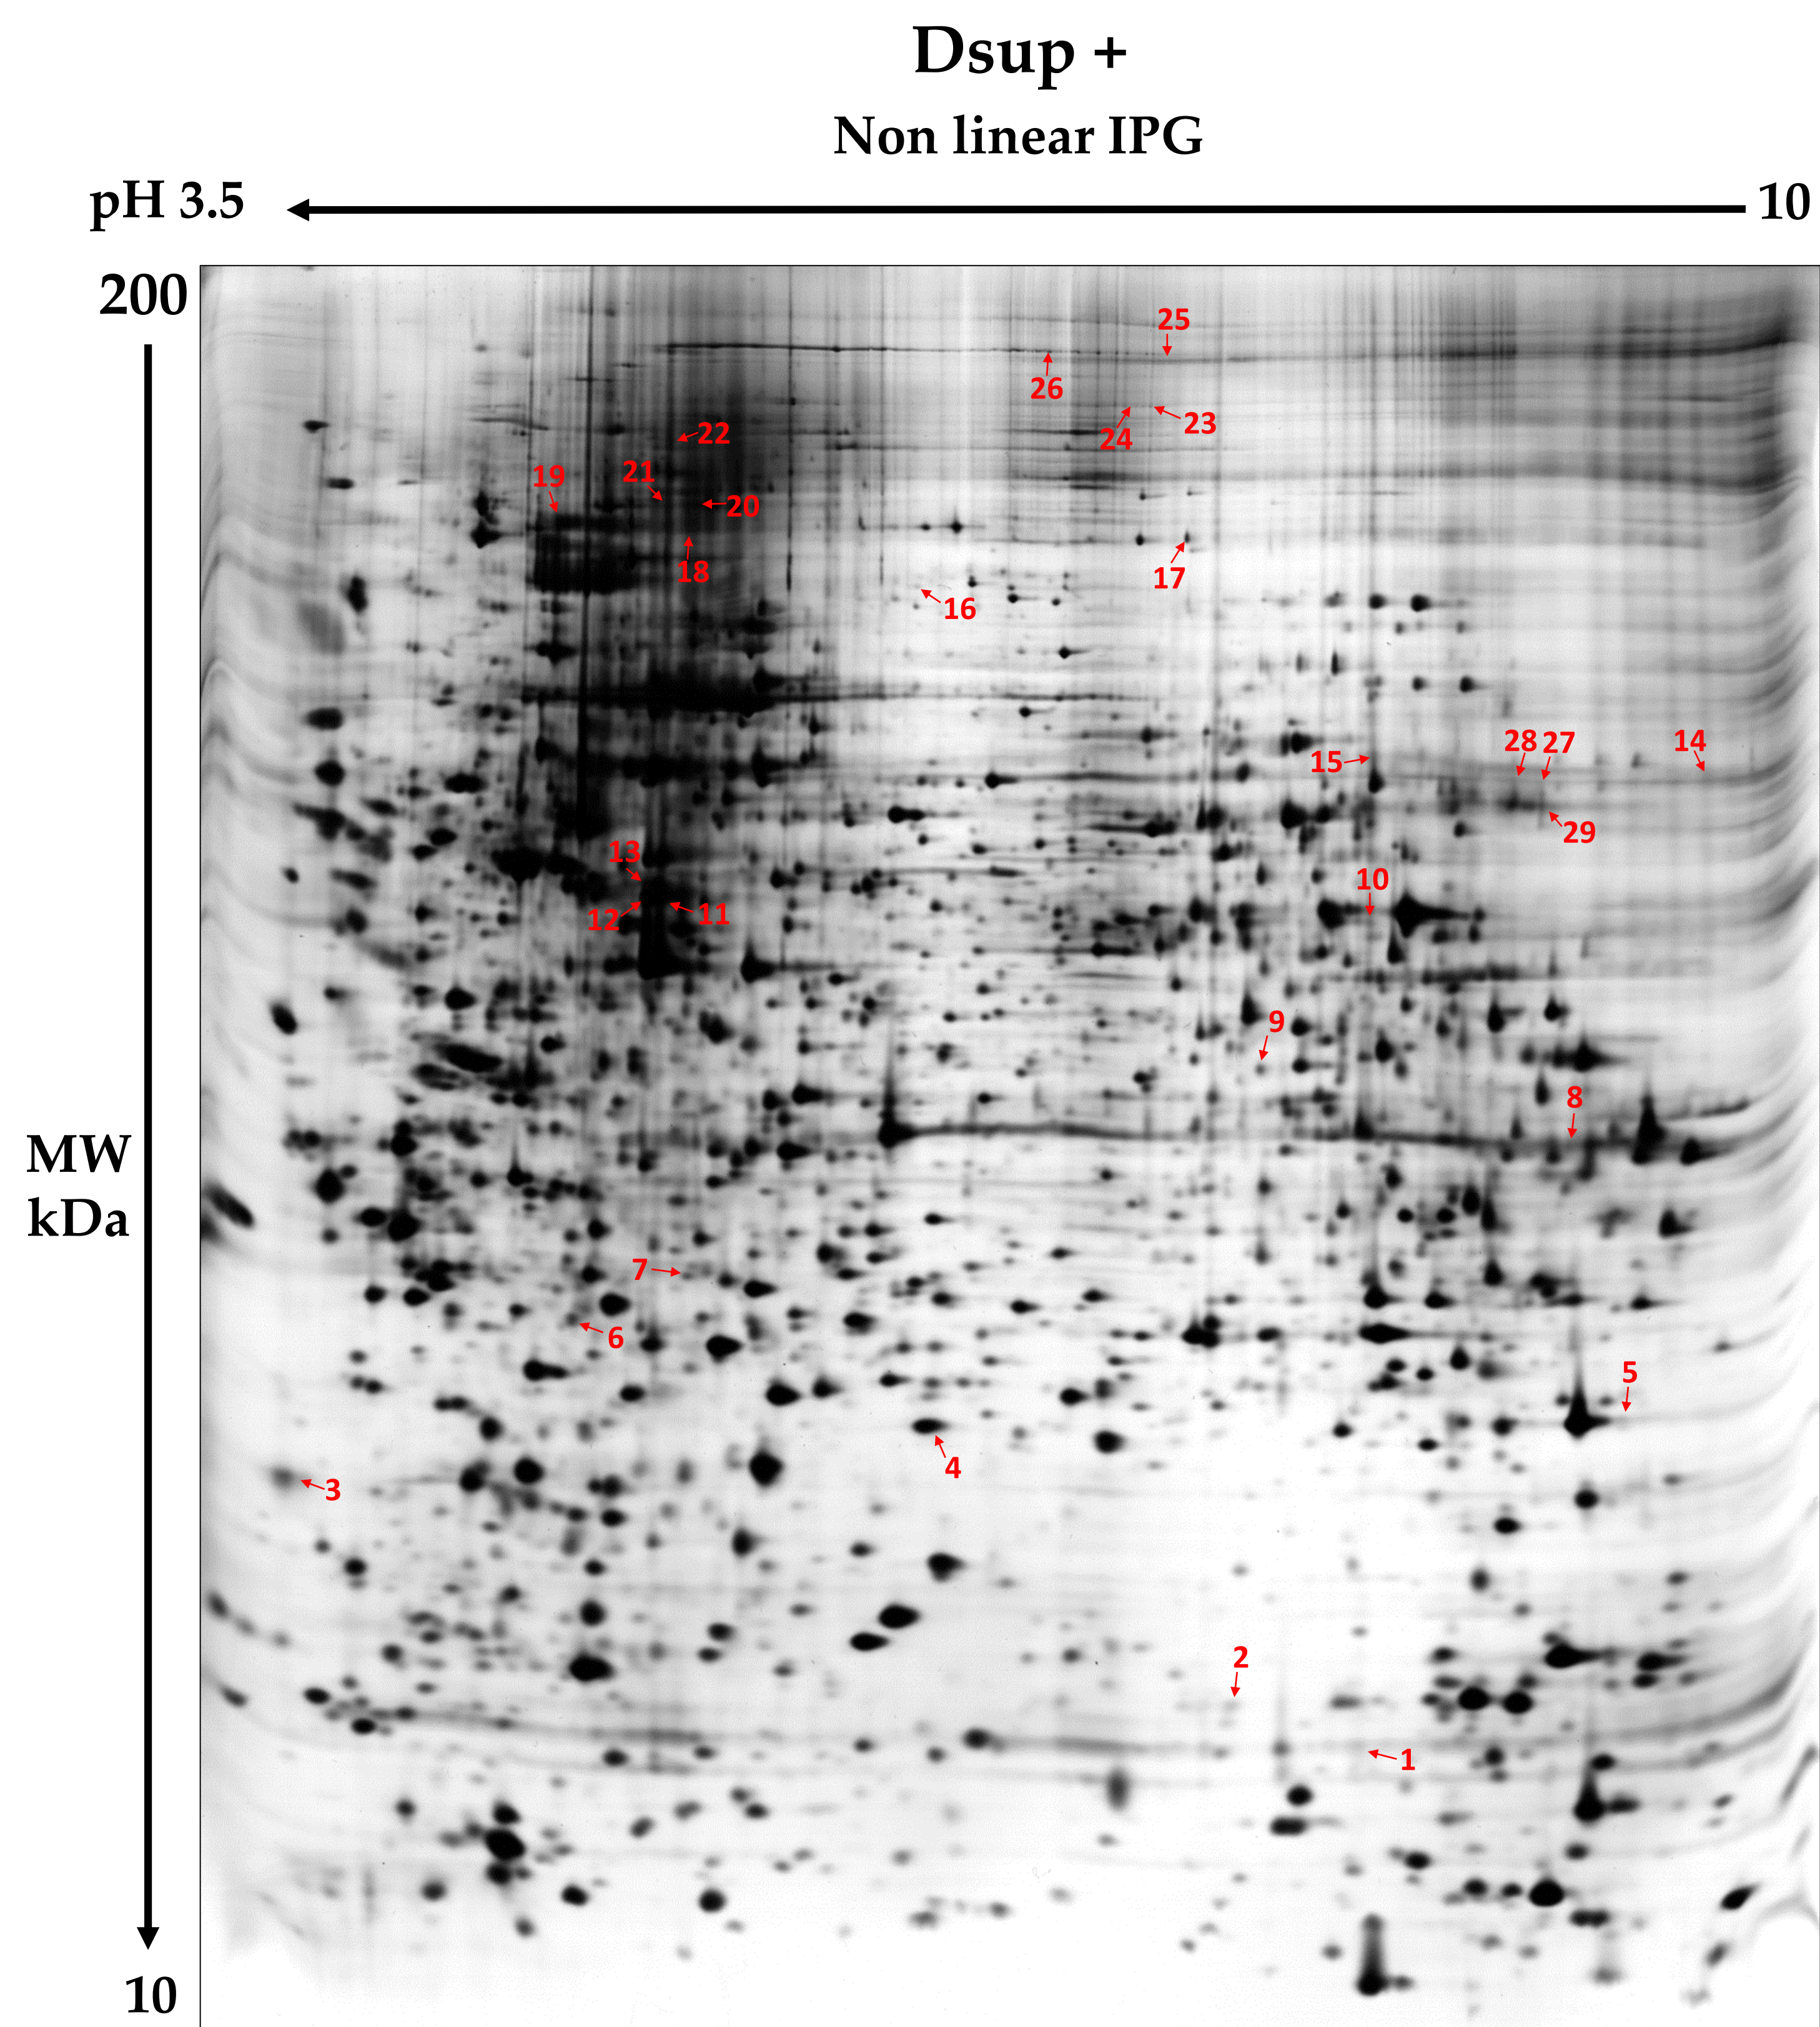

**Figure S1: Representative 2DE electropherograms of Dsup– vs Dsup+ HEK293T cells at basal condition.** The differentially abundant spots between the two considered conditions are reported in red. Spot numbers correspond to those showed in Table S1.



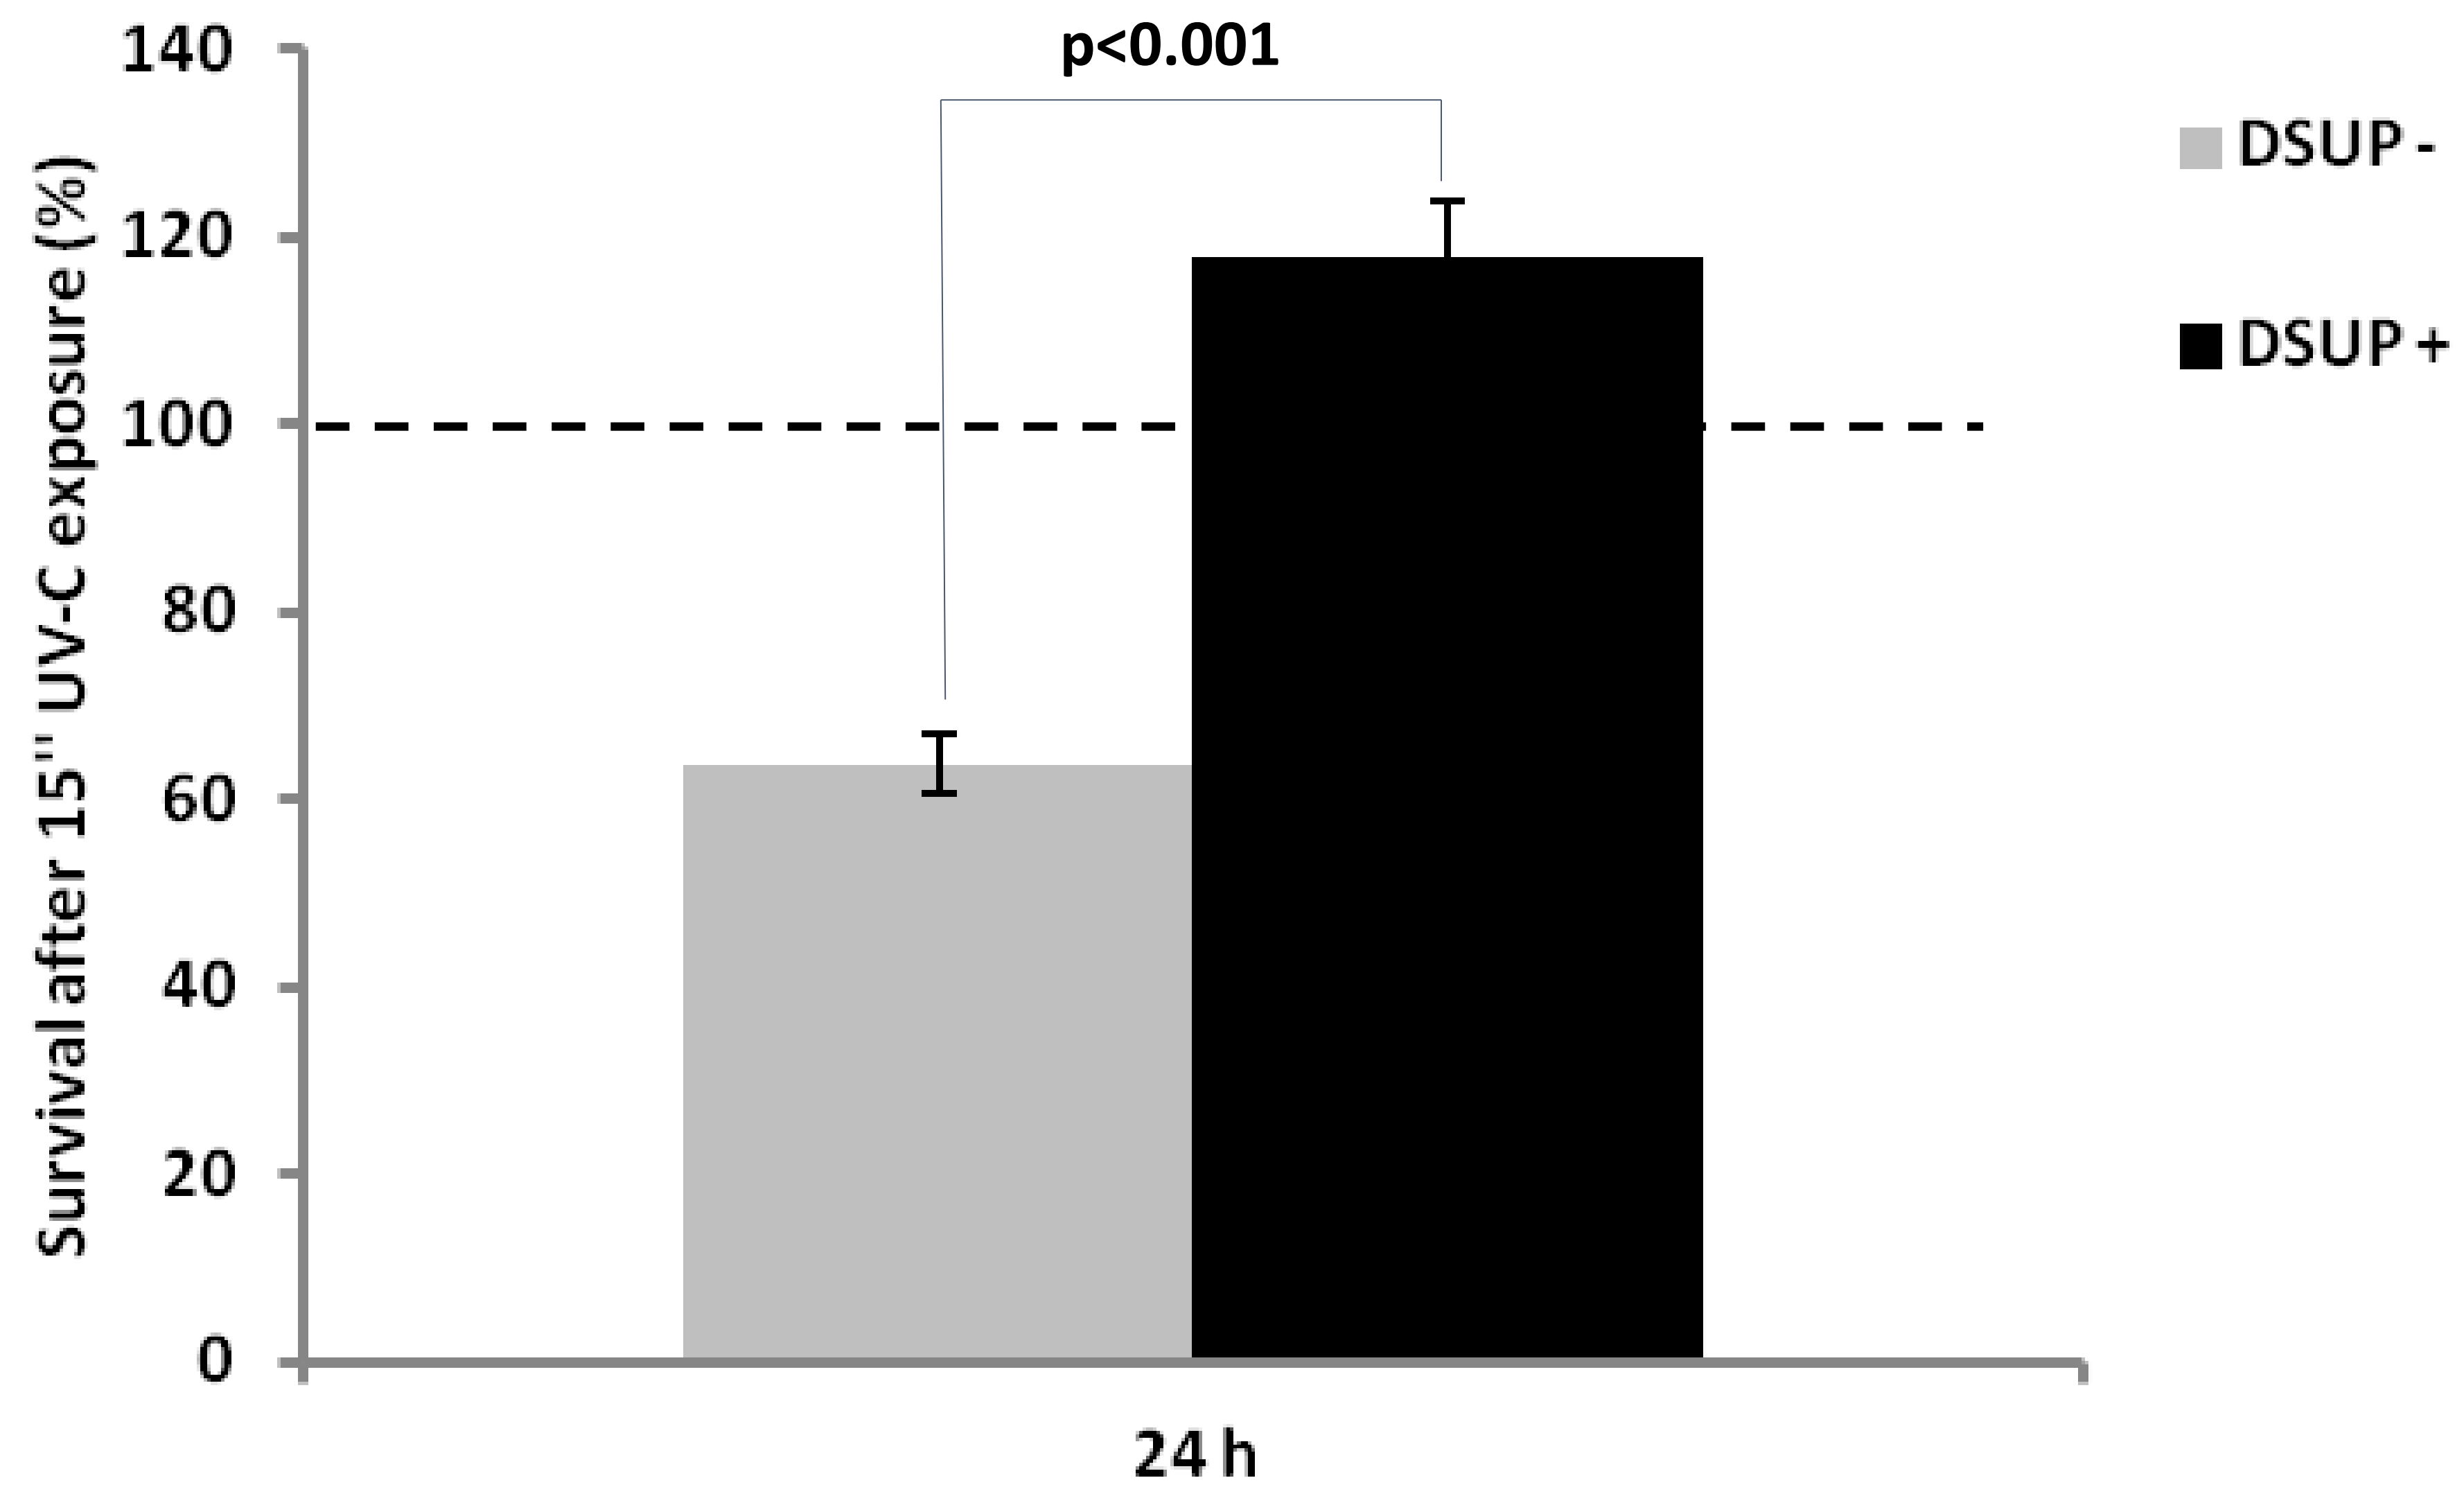

**Figure S2:** Survival assay of HEK293T cells control (Dsup-) and Dsup-transfected (Dsup+) after 15" of UV-C exposure recovered after 24h. The dotted line represents the basal condition (100%)



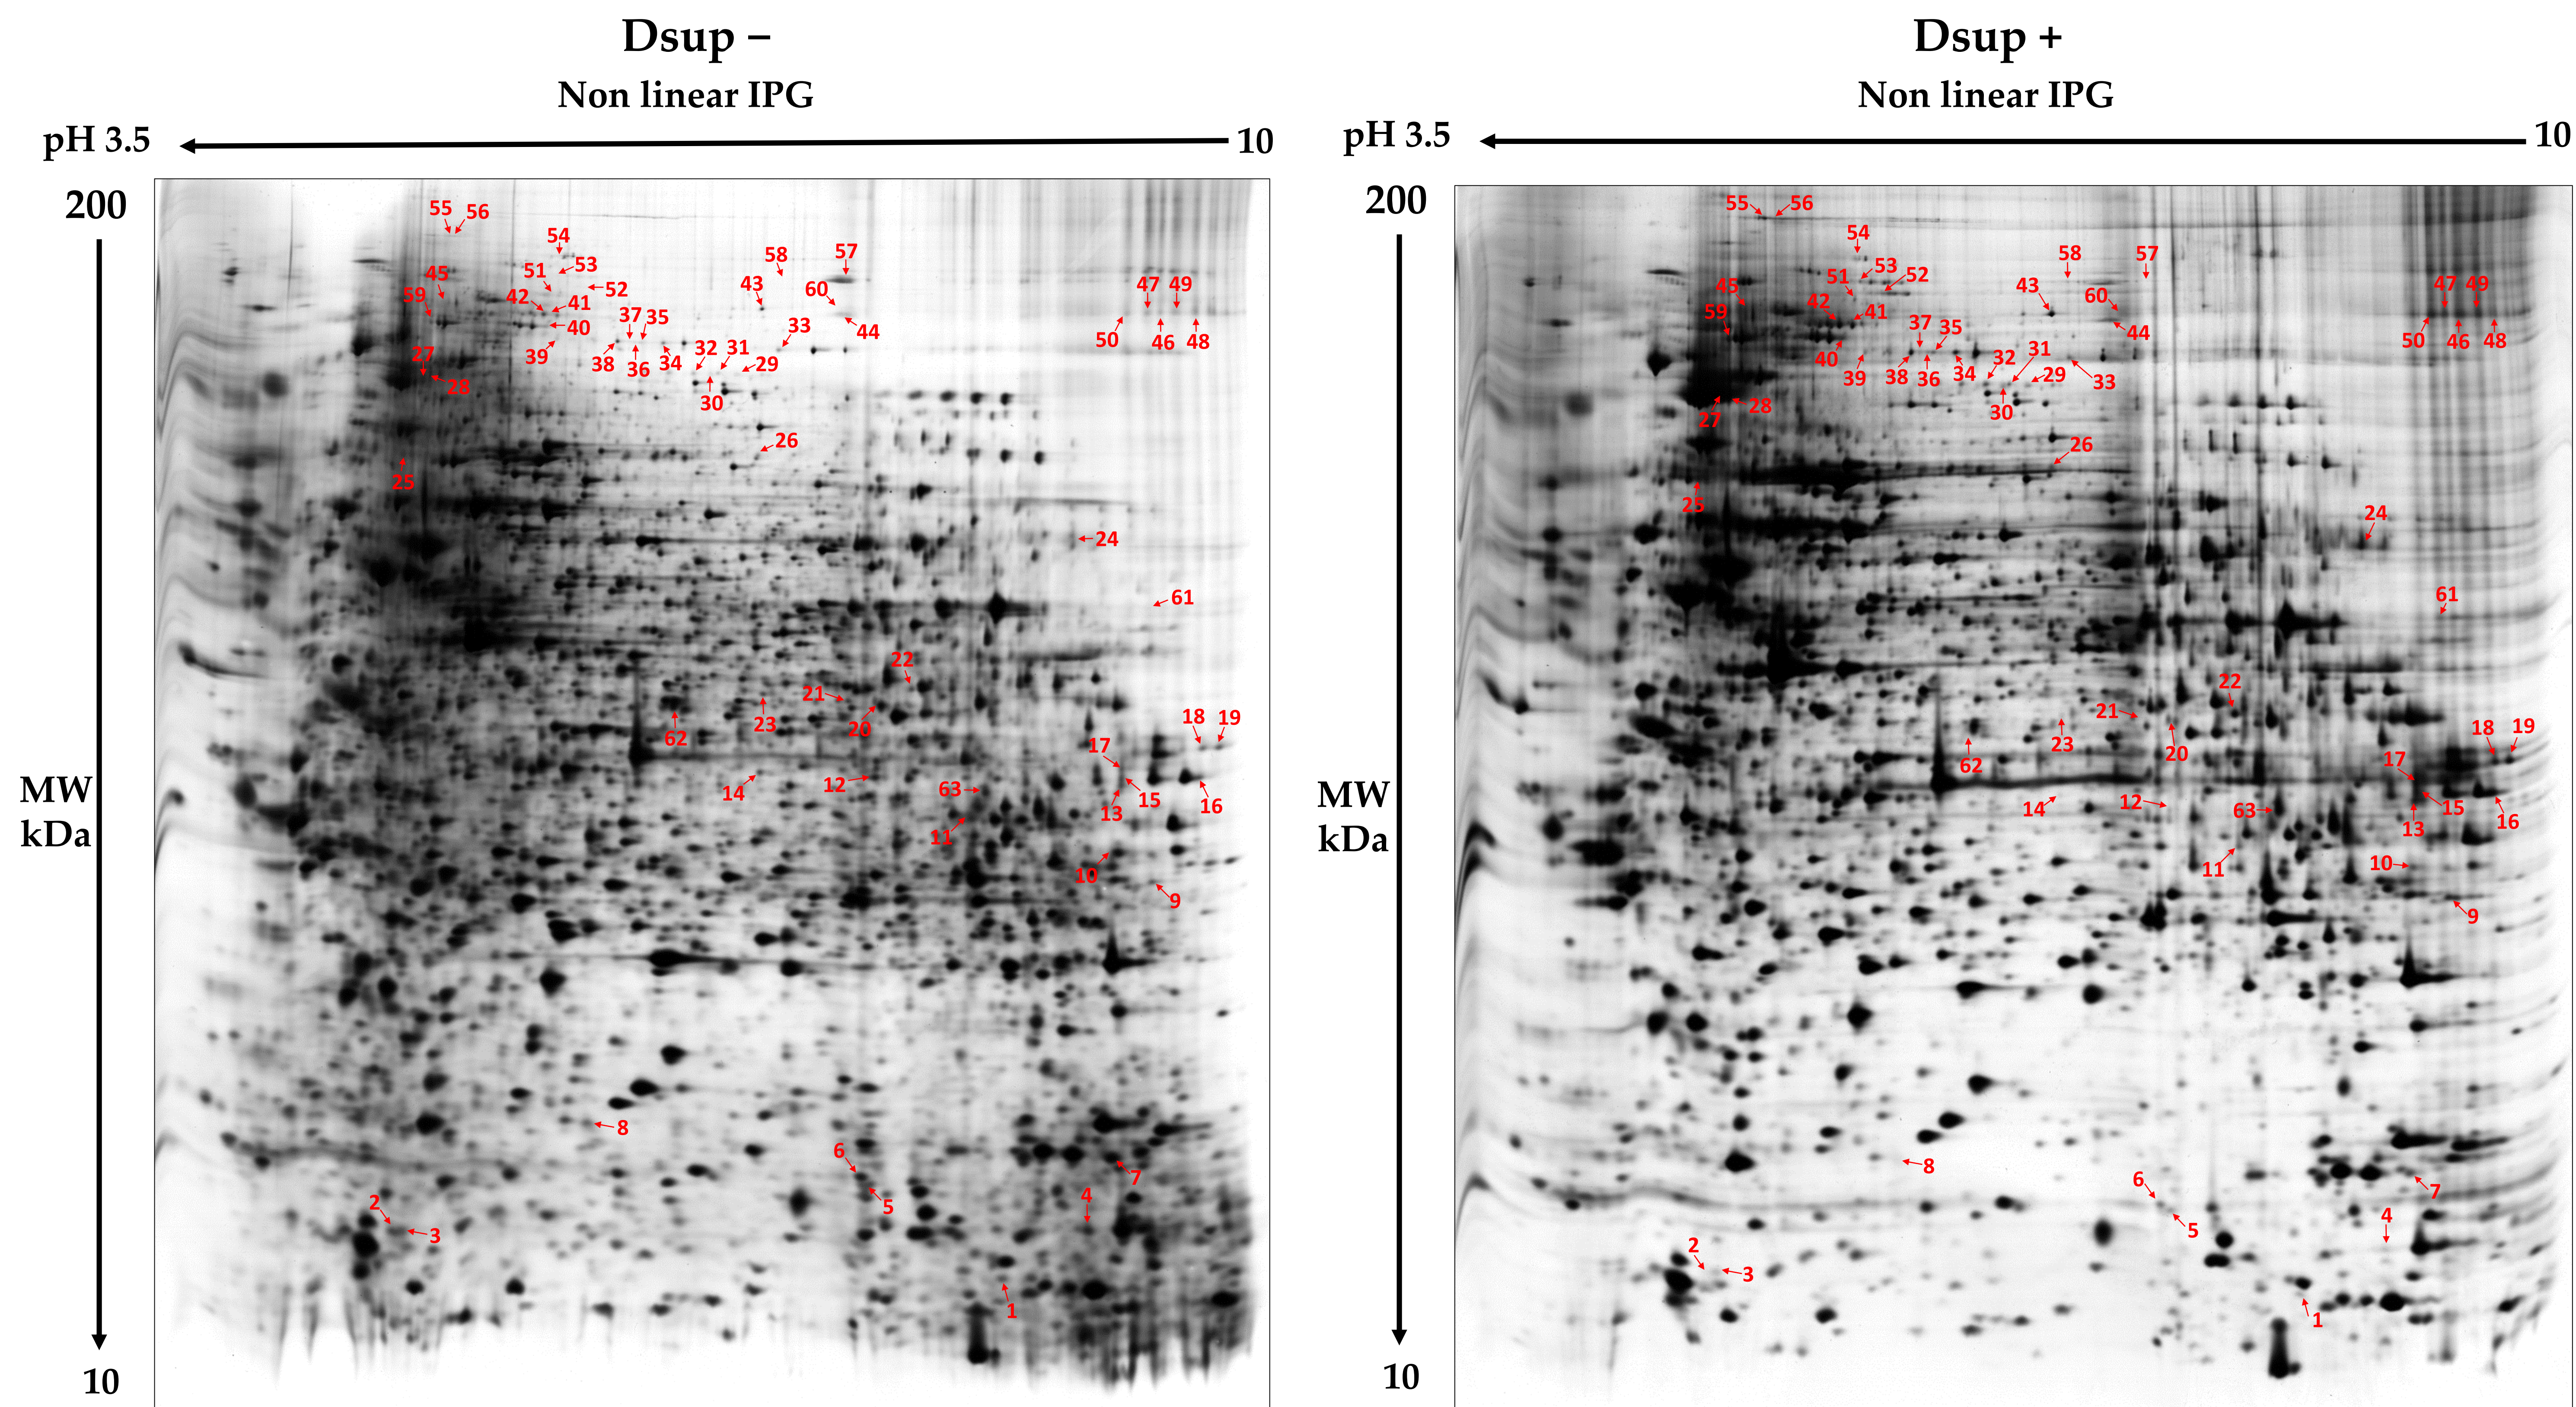

**Figure S3: Representative 2DE electropherograms of Dsup- vs Dsup+ HEK293T cells exposed to 15 seconds of UV-C radiation and recovered after 24h.** The differentially abundant spots between the two considered conditions are reported in red. Spot numbers correspond to that in Table S2.



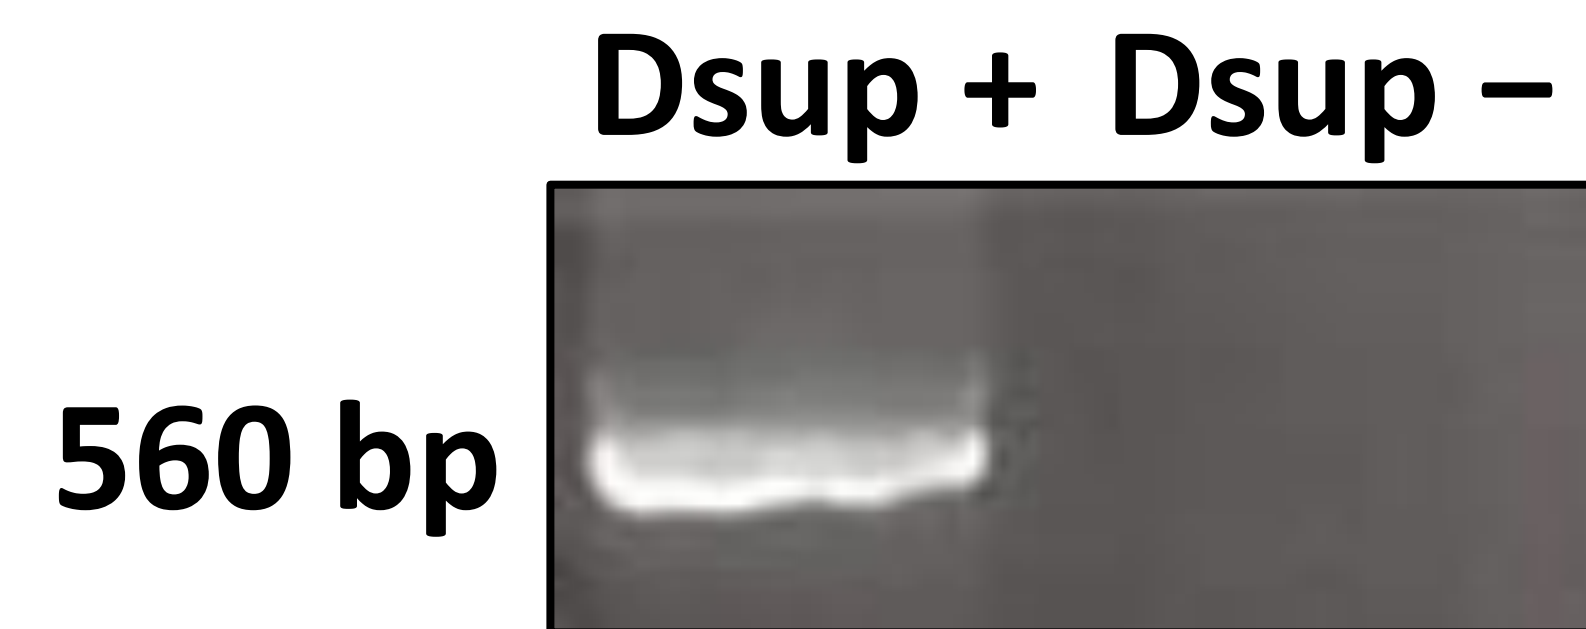

**Figure S4. Dsup expression assessment.** Dsup expression in control (Dsup–) and transfected (Dsup+) HEK293T cells was performed by endpoint PCR and visualized in 2% agarose gel by ethidium bromide.

NETWORK OBJECTS

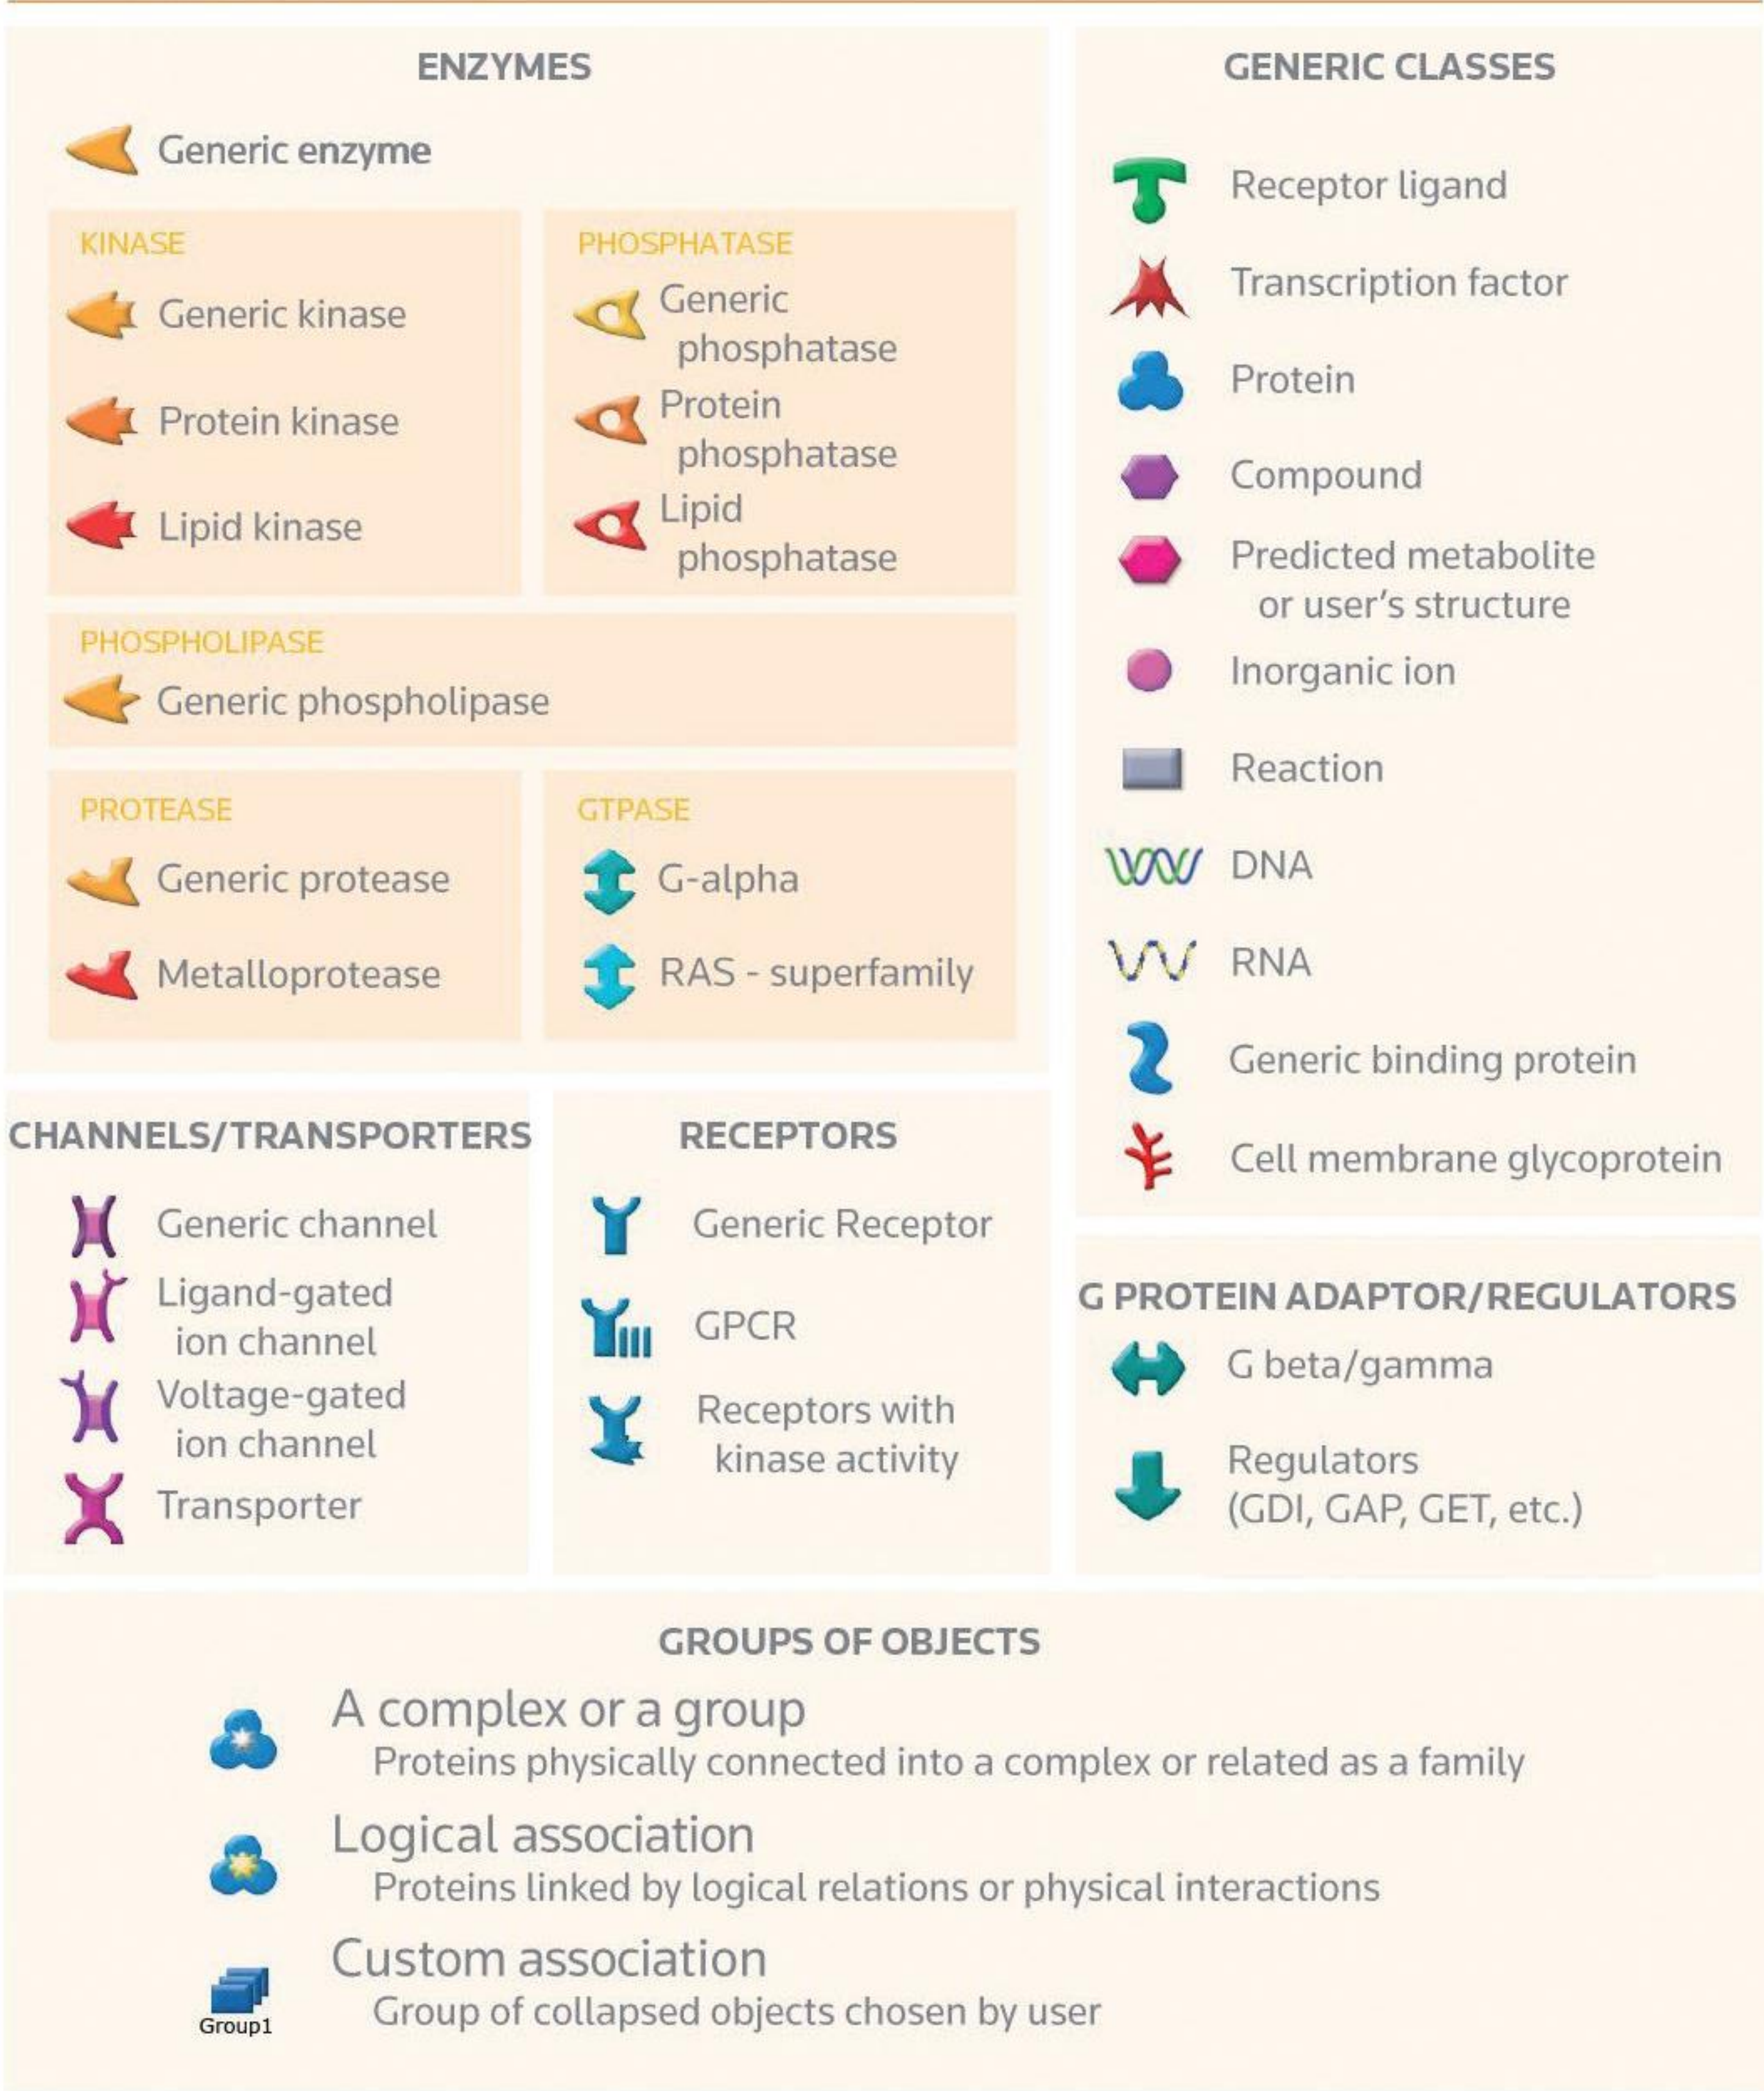

Supplement: s1 [file s1]
