# Supplementary material for: Proteomics Reveals How the Tardigrade Damage Suppressor Protein Teaches Transfected Human Cells to Survive UV-C Stress
Source: MDPI journal article supplement (doi:10.3390/ijms241411463), 2023-07-14
Supplement: s1 [file s1]

**Table S1. Proteomic data and identifications of differential spots in Dsup-/+ HEK293T cells at basal condition**

Table reports the spot number corresponding to that in Figure S3, protein name when the protein was identified by MALDI-ToF MS, UniProt Entry name and accession number (AC), the ANOVA Test and the mean of the %V of the specific spot in Dsup- and Dsup+ cells, the fold change of the %V means of Dsup- vs Dsup+ and viceversa, pI and MW. Last part of the table is dedicated to Mascot Search Results such as Score and Expect, Matched Peptides and sequence Coverage (%).

| Spot<br>n° | Protein name                                                      | Entry name  | AC     | Anova test   |                  |                  | Ratio              |                    | pI - MW      | Mascot Search Results      |                            |                 |    |
|------------|-------------------------------------------------------------------|-------------|--------|--------------|------------------|------------------|--------------------|--------------------|--------------|----------------------------|----------------------------|-----------------|----|
|            |                                                                   |             |        | Anova<br>(p) | (Basal)<br>Dsup- | (Basal)<br>Dsup+ | (Basal)<br>Dsup-/+ | (Basal)<br>Dsup+/- |              | Score<br>Expect            | Matched<br>peptides        | Coverage<br>(%) |    |
| 1          |                                                                   |             |        | 0.003        | 0.043355         | 0.016045         | 2.702161872        | 0.370074054        |              |                            |                            |                 |    |
| 2          |                                                                   |             |        | 0.011        | 0.019463         | 0.007949         | 2.448426838        | 0.408425518        |              |                            |                            |                 |    |
| 3          | Prostaglandin E<br>synthase 3                                     | TEBP_HUMAN  | Q15185 | 0.040        | 0.025233         | 0.050755         | 0.497158563        | 2.011430708        | 4.35 - 18971 | 128<br>3.2E <sup>-09</sup> |                            | 8/12            | 45 |
| 4          | Heat shock 70 kDa<br>protein 1A <u>N-term</u><br>fragment         | HS71A_HUMAN | P0DMV8 | 0.009        | 0.074455         | 0.165706         | 0.449321792        | 2.225576452        | 5.48 - 70294 | 224                        | 169<br>2.6E <sup>-13</sup> | 17/30           | 26 |
|            | Heat shock<br>cognate 71 kDa<br>protein <u>N-term</u><br>fragment | HSP7C_HUMAN | P11142 |              |                  |                  |                    |                    | 5.37 - 71082 |                            | 89<br>2.3E <sup>-05</sup>  | 12/30           | 21 |
| 5          | Peroxiredoxin-1                                                   | PRDX1_HUMAN | Q06830 | 0.018        | 0.161855         | 0.040361         | 4.010171485        | 0.249365895        | 8.27 - 22324 | 230<br>2E <sup>-19</sup>   |                            | 13/15           | 62 |
| 6          | Heat shock 70 kDa<br>protein 1A <u>C-term</u><br>fragment         | HS71A_HUMAN | P0DMV8 | 0.007        | 0.006086         | 0.038048         | 0.159949258        | 6.251982753        | 5.48 - 70294 | 111<br>1.6E <sup>-07</sup> |                            | 10/14           | 16 |
| 7          | Pyruvate kinase<br>PKM <u>N-term</u><br>fragment                  | KPYM_HUMAN  | P14618 | 0.010        | 0.002012         | 0.0199           | 0.101115909        | 9.889640595        | 7.96 - 58470 | 152<br>1.3E <sup>-11</sup> |                            | 12/20           | 26 |
| 8          | Heterogeneous<br>nuclear<br>ribonucleoproteins<br>A2/B1           | ROA2_HUMAN  | P22626 | 0.036        | 0.07028          | 0.030466         | 2.306830143        | 0.433495289        | 8-97 - 37464 | 173<br>1E <sup>-13</sup>   |                            | 12/15           | 42 |
| 9          | Pyruvate kinase<br>PKM <u>N-term</u><br>fragment                  | KPYM_HUMAN  | P14618 | 0.046        | 0.004739         | 0.030441         | 0.155674606        | 6.423655244        | 7.96 - 58470 | 181<br>1.6E <sup>-14</sup> |                            | 14/17           | 27 |

|    |                                                           |                         |                 |       |          |          |             |             |                              |                            |                            |       |    |
|----|-----------------------------------------------------------|-------------------------|-----------------|-------|----------|----------|-------------|-------------|------------------------------|----------------------------|----------------------------|-------|----|
| 10 | Alpha-enolase                                             | ENOA_HUMAN              | P06733          | 0.037 | 0.018212 | 0.008153 | 2.23389549  | 0.447648516 | 7.01 - 47481                 | 122<br>1.3E <sup>-08</sup> | 8/10                       | 16    |    |
| 11 | Actin. cytoplasmic 1 / Actin. cytoplasmic 2               | ACTB_HUMAN / ACTG_HUMAN | P60709 / P63261 | 0.037 | 0.046185 | 0.10382  | 0.444861478 | 2.247890748 | 5.29 - 42052<br>5.31 - 42108 | 197<br>4.1E <sup>-16</sup> | 18/30                      | 45    |    |
| 12 | Eukaryotic initiation factor 4A-II                        | IF4A2_HUMAN             | Q14240          | 0.012 | 0.043265 | 0.132976 | 0.325356519 | 3.073551449 | 5.33 - 46601                 | 93<br>9.3E <sup>-06</sup>  | 10/28                      | 26    |    |
| 13 | Eukaryotic initiation factor 4A-II                        | IF4A2_HUMAN             | Q14240          | 0.005 | 0.020374 | 0.046276 | 0.440278618 | 2.27128904  | 5.33 - 46601                 | 75<br>6.4E <sup>-04</sup>  | 9/32                       | 25    |    |
| 14 |                                                           |                         |                 | 0.004 | 0.051314 | 0.025473 | 2.014449267 | 0.496413594 |                              |                            |                            |       |    |
| 15 | Asparagine synthetase [glutamine-hydrolyzing]             | ASNS_HUMAN              | P08243          | 0.030 | 0.058045 | 0.027783 | 2.089232774 | 0.478644607 | 6.39 - 64899                 | 139<br>2.6E <sup>-10</sup> | 9/10                       | 14    |    |
| 16 |                                                           |                         |                 | 0.020 | 0.005422 | 0.002635 | 2.057749068 | 0.485967903 |                              |                            |                            |       |    |
| 17 |                                                           |                         |                 | 0.049 | 0.055061 | 0.02651  | 2.076969696 | 0.481470674 |                              |                            |                            |       |    |
| 18 | Striatin-4                                                | STRN4_HUMAN             | Q9NRL3          | 0.047 | 0.008072 | 0.020211 | 0.399375914 | 2.503906631 | 5.21 - 81287                 | 103<br>1E <sup>-06</sup>   | 8/11                       | 13    |    |
| 19 | Heat shock protein HSP 90-beta                            | HS90B_HUMAN             | P08238          | 0.020 | 0.013532 | 0.038488 | 0.351600345 | 2.844138278 | 4.97 - 83554                 | 168                        | 106<br>5.1E <sup>-07</sup> | 14/36 | 21 |
|    | Cleavage and polyadenylation specificity factor subunit 2 | CPSF2_HUMAN             | Q9P2I0          |       |          |          |             |             | 4.98 - 89286                 |                            | 84<br>7.7E <sup>-05</sup>  | 15/36 | 16 |
| 20 | DNA replication licensing factor MCM6                     | MCM6_HUMAN              | Q14566          | 0.049 | 0.014905 | 0.033412 | 0.446097602 | 2.241661905 | 5.29 - 93801                 | 163<br>1E <sup>-12</sup>   | 16/25                      | 19    |    |
| 21 | DNA replication licensing factor MCM6                     | MCM6_HUMAN              | Q14566          | 0.043 | 0.020144 | 0.041181 | 0.489161616 | 2.044314124 | 5.29 - 93801                 | 146<br>5.1E <sup>-11</sup> | 13/17                      | 15    |    |
| 22 |                                                           |                         |                 | 0.027 | 0.006606 | 0.020521 | 0.321895365 | 3.106599559 |                              |                            |                            |       |    |
| 23 |                                                           |                         |                 | 0.013 | 0.000986 | 0.002336 | 0.421981066 | 2.369774571 |                              |                            |                            |       |    |
| 24 |                                                           |                         |                 | 0.012 | 0.001525 | 0.004027 | 0.378789183 | 2.639990909 |                              |                            |                            |       |    |
| 25 |                                                           |                         |                 | 0.045 | 0.002205 | 0.004461 | 0.494212097 | 2.023422748 |                              |                            |                            |       |    |

|    |                                       |            |        |       |          |          |             |             |              |                            |       |    |
|----|---------------------------------------|------------|--------|-------|----------|----------|-------------|-------------|--------------|----------------------------|-------|----|
| 26 |                                       |            |        | 0.035 | 0.002161 | 0.00501  | 0.431435301 | 2.31784464  |              |                            |       |    |
| 27 | Tyrosine--tRNA<br>ligase. cytoplasmic | SYYC_HUMAN | P54577 | 0.027 | 0.097784 | 0.036367 | 2.688779653 | 0.371915935 | 6.61 - 59448 | 118<br>3.2E <sup>-08</sup> | 9/13  | 25 |
| 28 | Tyrosine--tRNA<br>ligase. cytoplasmic | SYYC_HUMAN | P54577 | 0.027 | 0.183837 | 0.081087 | 2.267169064 | 0.441078707 | 6.61 - 59448 | 119<br>2.6E <sup>-08</sup> | 10/15 | 21 |
| 29 | T-complex protein<br>1 subunit delta  | TCPD_HUMAN | P50991 | 0.013 | 0.174077 | 0.066644 | 2.612048545 | 0.382841277 | 7.96 - 58401 | 161<br>1.6E <sup>-12</sup> | 13/16 | 27 |

**Table S2: Proteomic data and identifications of differential spots in Dsup-/+ HEK293T cells at 24h recovery after 15 seconds of UV-C radiation**

Table reports the spot number corresponding to that in Figure S4, protein name when the protein was identified by MALDI-ToF MS, UniProt Entry name and accession number (AC), the ANOVA Test and the mean of the %V of the specific spot in Dsup- and Dsup+ cells, the fold change of the %V means of Dsup- vs Dsup+ and viceversa, pI and MW. Last part of the table is dedicated to Mascot Search Results such as Score and Expect, Matched Peptides and sequence Coverage (%).

| Spot<br>n° | Protein name                                         | Entry name  | AC     | Anova test   |               |               | Ratio            |                  | pI - MW      | Mascot Search Results      |                           |                  |    |
|------------|------------------------------------------------------|-------------|--------|--------------|---------------|---------------|------------------|------------------|--------------|----------------------------|---------------------------|------------------|----|
|            |                                                      |             |        | Anova<br>(p) | (UV)<br>Dsup– | (UV)<br>Dsup+ | (UV)<br>Dsup –/+ | (UV)<br>Dsup +/- |              | Score<br>Expect            | Matched<br>peptides       | Covera<br>ge (%) |    |
| 1          |                                                      |             |        | 0.030        | 0.021045      | 0.0093442     | 2.252196461      | 0.444010999      |              |                            |                           |                  |    |
| 2          | Regulator<br>complex<br>protein<br>LAMTOR2           | LTOR2_HUMAN | Q9Y2Q5 | 0.026        | 0.0190797     | 0.0040741     | 4.683227283      | 0.213527967      | 5.30 - 13613 | 103                        | 78<br>2.9E <sup>-04</sup> | 5/14             | 38 |
|            | Replication<br>protein A 14<br>kDa subunit           | RFA3_HUMAN  | P35244 |              |               |               |                  |                  | 4.96 - 13674 |                            | 63<br>9.5E <sup>-03</sup> | 4/14             | 54 |
| 3          | Thioredoxin                                          | THIO_HUMAN  | P10599 | 0.013        | 0.0270251     | 0.0090355     | 2.99097785       | 0.334338818      | 4.82 - 12015 | 69<br>2.8E <sup>-03</sup>  | 5/7                       | 32               |    |
| 4          |                                                      |             |        | 0.050        | 0.0481777     | 0.011223      | 4.292765278      | 0.232950077      |              |                            |                           |                  |    |
| 5          |                                                      |             |        | 0.005        | 0.0467749     | 0.0196331     | 2.382453412      | 0.419735385      |              |                            |                           |                  |    |
| 6          |                                                      |             |        | 0.028        | 0.0379288     | 0.0156038     | 2.430736037      | 0.411398023      |              |                            |                           |                  |    |
| 7          | Peptidyl-prolyl<br>cis-trans<br>isomerase A          | PPIA_HUMAN  | P62937 | 0.015        | 0.0833672     | 0.0167316     | 4.982629633      | 0.200697237      | 7.68-18229   | 182<br>1.3E <sup>-14</sup> | 13/26                     | 58               |    |
| 8          | Actin-related<br>protein 2/3<br>complex<br>subunit 5 | ARPC5_HUMAN | O15511 | 0.030        | 0.0273185     | 0.0094444     | 2.892558075      | 0.345714753      | 5.47-16367   | 146<br>5.1E <sup>-11</sup> | 11/17                     | 52               |    |
| 9          | Peroxiredoxin-<br>1                                  | PRDX1_HUMAN | Q06830 | 0.022        | 0.0184992     | 0.0615035     | 0.300783424      | 3.324651292      | 8.27- 22324  | 100<br>2E <sup>-06</sup>   | 7/16                      | 35               |    |
| 10         |                                                      |             |        | 0.042        | 0.0711136     | 0.0263909     | 2.694627939      | 0.371108748      |              |                            |                           |                  |    |
| 11         | S-                                                   | ESTD_HUMAN  | P10768 | 0.037        | 0.0474349     | 0.0213141     | 2.225519297      | 0.449333331      | 6.54-31956   | 158                        | 11/17                     | 50               |    |

|    |                                                    |             |        |         |           |           |             |             |              |                            |       |    |
|----|----------------------------------------------------|-------------|--------|---------|-----------|-----------|-------------|-------------|--------------|----------------------------|-------|----|
|    | formylglutathione hydrolase                        |             |        |         |           |           |             |             |              | 3.2E <sup>-12</sup>        |       |    |
| 12 | Phosphatidylinositol transfer protein beta isoform | PIPNB_HUMAN | P48739 | 0.010   | 0.0342307 | 0.0064848 | 5.278594214 | 0.189444378 | 6.41-31805   | 356<br>5.1E <sup>-32</sup> | 23/26 | 67 |
| 13 | Heterogeneous nuclear ribonucleoproteins A2/B1     | ROA2_HUMAN  | P22626 | 0.010   | 0.0270482 | 0.0973908 | 0.277728245 | 3.600642064 | 8.97-37464   | 143<br>1E <sup>-10</sup>   | 10/15 | 38 |
| 14 |                                                    |             |        | 0.049   | 0.0118442 | 0.0021141 | 5.602421492 | 0.178494246 |              |                            |       |    |
| 15 | Heterogeneous nuclear ribonucleoproteins A2/B1     | ROA2_HUMAN  | P22626 | 0.001   | 0.0135462 | 0.0539949 | 0.250879095 | 3.985983769 | 8.97-37464   | 213<br>1E <sup>-17</sup>   | 14/17 | 42 |
| 16 | Heterogeneous nuclear ribonucleoproteins A2/B1     | ROA2_HUMAN  | P22626 | 0.008   | 0.0281454 | 0.0620498 | 0.453592945 | 2.204619825 | 8.97-37464   | 114<br>8.1E <sup>-08</sup> | 8/13  | 35 |
| 17 | Heterogeneous nuclear ribonucleoproteins A2/B1     | ROA2_HUMAN  | P22626 | 0.042   | 0.0395889 | 0.1261191 | 0.313901255 | 3.1857152   | 8.97-37464   | 186<br>5.1E <sup>-15</sup> | 13/18 | 42 |
| 18 | Heterogeneous nuclear ribonucleoproteins A2/B1     | ROA2_HUMAN  | P22626 | <0.0001 | 0.0243909 | 0.064495  | 0.378182093 | 2.644228851 | 8.97-37464   | 344<br>8.1E <sup>-31</sup> | 23/25 | 53 |
| 19 | Heterogeneous nuclear ribonucleoproteins A2/B1     | ROA2_HUMAN  | P22626 | <0.0001 | 0.0170888 | 0.0497053 | 0.343801701 | 2.908653443 | 8.97-37464   | 167<br>4.1E <sup>-13</sup> | 11/14 | 42 |
| 20 | Poly(rC)-binding protein 1                         | PCBP1_HUMAN | Q15365 | 0.035   | 0.0688577 | 0.0337199 | 2.042048324 | 0.489704376 | 6.66-37987   | 137<br>4.1E <sup>-10</sup> | 10/15 | 41 |
| 21 |                                                    |             |        | 0.016   | 0.0061338 | 0.0013465 | 4.555468387 | 0.219516395 |              |                            |       |    |
| 22 | Mitogen-activated protein kinase                   | MK01_HUMAN  | P28482 | 0.019   | 0.0164557 | 0.0342318 | 0.480713334 | 2.080241862 | 6.50 - 41762 | 175<br>5.1e <sup>-09</sup> | 10/20 | 24 |

|    | 1                                                 |             |        |       |           |           |             |             |             |                            |       |    |
|----|---------------------------------------------------|-------------|--------|-------|-----------|-----------|-------------|-------------|-------------|----------------------------|-------|----|
|    | Sialic acid synthase                              | SIAS_HUMAN  | Q9NR45 |       |           |           |             |             |             |                            |       |    |
| 23 | Translation initiation factor eIF-2B subunit beta | EI2BB_HUMAN | P49770 | 0.047 | 0.0113539 | 0.0031515 | 3.602685479 | 0.277570719 | 5.77-39193  | 216<br>5.1E <sup>-18</sup> | 17/24 | 45 |
| 24 | D-3-phosphoglycerate dehydrogenase                | SERA_HUMAN  | O43175 | 0.003 | 0.022067  | 0.07731   | 0.285434953 | 3.50342518  | 6.29-57356  | 160<br>2E <sup>-12</sup>   | 14/24 | 31 |
| 25 | Heat shock 70 kDa protein 1A                      | HS71A_HUMAN | P0DMV8 | 0.037 | 0.03986   | 0.0879722 | 0.453097683 | 2.207029604 | 5.48- 70294 | 275<br>6.4E <sup>-24</sup> | 21/29 | 43 |
|    | Heat shock 70 kDa protein 1B                      | HS71B_HUMAN | P0DMV9 |       |           |           |             |             | 5.48- 70294 | 275<br>6.4E <sup>-24</sup> | 21/29 | 43 |
| 26 | Heat shock 70 kDa protein 1A                      | HS71A_HUMAN | P0DMV8 | 0.047 | 0.0059819 | 0.0130175 | 0.459529213 | 2.176140214 | 5.48- 70294 | 161<br>1.6E <sup>-12</sup> | 12/15 | 23 |
|    | Heat shock 70 kDa protein 1B                      | HS71B_HUMAN | P0DMV9 |       |           |           |             |             | 5.48- 70294 | 161<br>1.6E <sup>-12</sup> | 12/15 | 23 |
| 27 | Heat shock protein HSP 90-beta                    | HS90B_HUMAN | P08238 | 0.017 | 0.0833278 | 0.1669537 | 0.499107138 | 2.003577839 | 4.97-83554  | 169<br>2.6E <sup>-13</sup> | 20/35 | 29 |
| 28 | Heat shock protein HSP 90-beta                    | HS90B_HUMAN | P08238 | 0.032 | 0.040419  | 0.0918989 | 0.439820484 | 2.273654904 | 4.97-83554  | 169<br>2.6E <sup>-13</sup> | 20/35 | 29 |
| 29 | Cold shock domain-containing protein E1           | CSDE1_HUMAN | O75534 | 0.048 | 0.003588  | 0.0085877 | 0.417811    | 2.393426693 | 5.88-89684  | 117<br>4.1E <sup>-08</sup> | 11/17 | 17 |
| 30 | Cold shock domain-containing protein E1           | CSDE1_HUMAN | O75534 | 0.003 | 0.0022853 | 0.0064755 | 0.352919859 | 2.833504472 | 5.88-89684  | 236<br>5.1E <sup>-20</sup> | 21/28 | 28 |
| 31 | Cold shock domain-                                | CSDE1_HUMAN | O75534 | 0.047 | 0.0035469 | 0.0075604 | 0.469145453 | 2.131535099 | 5.88-89684  | 101<br>1.6E <sup>-06</sup> | 9/13  | 13 |

|    |                                             |             |        |       |           |           |             |             |               |                            |       |    |
|----|---------------------------------------------|-------------|--------|-------|-----------|-----------|-------------|-------------|---------------|----------------------------|-------|----|
|    | containing protein E1                       |             |        |       |           |           |             |             |               |                            |       |    |
| 32 | Cold shock domain-containing protein E1     | CSDE1_HUMAN | O75534 | 0.048 | 0.0046699 | 0.0097517 | 0.478884216 | 2.088187429 | 5.88-89684    | 74<br>7.9E <sup>-04</sup>  | 8/18  | 14 |
| 33 | Elongation factor 2                         | EF2_HUMAN   | P13639 | 0.032 | 0.0081677 | 0.0196089 | 0.416530617 | 2.400783901 | 6.41-96246    | 178<br>3.2E <sup>-14</sup> | 16/20 | 21 |
| 34 | Neutral alpha-glucosidase AB                | GANAB_HUMAN | Q14697 | 0.028 | 0.0068976 | 0.0216881 | 0.318036493 | 3.144293254 | 5.74-107263   | 316<br>5.1E <sup>-28</sup> | 29/34 | 32 |
| 35 | Heat shock 70 kDa protein 4L                | HS74L_HUMAN | O95757 | 0.016 | 0.0040901 | 0.0144419 | 0.283208476 | 3.530967761 | 5.63 - 95479  | 61<br>1.5E <sup>-02</sup>  | 5/6   | 8  |
| 36 | Heat shock 70 kDa protein 4L                | HS74L_HUMAN | O95757 | 0.028 | 0.0016363 | 0.0072614 | 0.225338917 | 4.437759864 | 5.63-95479    | 124<br>8.1E <sup>-09</sup> | 13/20 | 16 |
| 37 | Heat shock 70 kDa protein 4L                | HS74L_HUMAN | O95757 | 0.021 | 0.0012532 | 0.0049527 | 0.253033774 | 3.952041592 | 5.63-95479    | 124<br>8.1E <sup>-09</sup> | 13/20 | 16 |
| 38 | Neutral alpha-glucosidase AB                | GANAB_HUMAN | Q14697 | 0.021 | 0.0079115 | 0.0167872 | 0.471280358 | 2.121879224 | 5.74-107263   | 97<br>2.9E <sup>-06</sup>  | 10/17 | 12 |
| 39 | Ubiquitin-like modifier-activating enzyme 1 | UBA1_HUMAN  | P22314 | 0.015 | 0.0010479 | 0.0048447 | 0.216293867 | 4.623339591 | 5.49 - 118858 | 57<br>3.9E <sup>-02</sup>  | 4/4   | 6  |
| 40 | Ubiquitin-like modifier-activating enzyme 1 | UBA1_HUMAN  | P22314 | 0.019 | 0.0099294 | 0.0352576 | 0.281624783 | 3.550823865 | 5.49- 118858  | 307<br>4.1E <sup>-27</sup> | 25/30 | 35 |
| 41 | Ubiquitin-like modifier-activating enzyme 1 | UBA1_HUMAN  | P22314 | 0.008 | 0.0075397 | 0.033307  | 0.226370933 | 4.417528287 | 5.49- 118858  | 165<br>6.4E <sup>-13</sup> | 17/29 | 24 |
| 42 | Ubiquitin-like modifier-activating enzyme 1 | UBA1_HUMAN  | P22314 | 0.001 | 0.0120293 | 0.0314904 | 0.381999189 | 2.617806604 | 5.49- 118858  | 303<br>1E <sup>-26</sup>   | 25/31 | 36 |
| 43 | Transcription intermediary factor 1-beta    | TIF1B_HUMAN | Q13263 | 0.018 | 0.0103278 | 0.0218028 | 0.473691565 | 2.111078334 | 5.52-90261    | 77<br>3.7E <sup>-04</sup>  | 7/11  | 10 |
| 44 |                                             |             |        | 0.010 | 0.0121098 | 0.0732296 | 0.165366965 | 6.047157017 |               |                            |       |    |

|    |                                                      |             |        |       |           |           |             |             |              |                            |       |    |
|----|------------------------------------------------------|-------------|--------|-------|-----------|-----------|-------------|-------------|--------------|----------------------------|-------|----|
| 45 | Transcription intermediary factor 1-beta             | TIF1B_HUMAN | Q13263 | 0.005 | 0.0151401 | 0.0435923 | 0.347311072 | 2.879263237 | 5.52-90261   | 109<br>2.6E <sup>-07</sup> | 11/22 | 16 |
| 46 |                                                      |             |        | 0.002 | 0.0122145 | 0.0421808 | 0.289574878 | 3.453338246 |              |                            |       |    |
| 47 |                                                      |             |        | 0.027 | 0.0190551 | 0.0476007 | 0.40031134  | 2.498055639 |              |                            |       |    |
| 48 | Heterogeneous nuclear ribonucleoprotein U            | HNRPU_HUMAN | Q00839 | 0.004 | 0.0217492 | 0.0640288 | 0.339679092 | 2.943955113 | 5.76-91269   | 60<br>8.5E <sup>-04</sup>  | 7/14  | 10 |
| 49 | Heterogeneous nuclear ribonucleoprotein U            | HNRPU_HUMAN | Q00839 | 0.000 | 0.0198534 | 0.0624223 | 0.318049435 | 3.144165305 | 5.76-91269   | 110<br>2E <sup>-07</sup>   | 8/9   | 13 |
| 50 | Heterogeneous nuclear ribonucleoprotein U            | HNRPU_HUMAN | Q00839 | 0.027 | 0.0166104 | 0.043295  | 0.383655541 | 2.606504773 | 5.76-91269   | 70<br>1.9E <sup>-03</sup>  | 5/5   | 9  |
| 51 | DNA replication licensing factor MCM2                | MCM2_HUMAN  | P49736 | 0.029 | 0.0012638 | 0.0041363 | 0.305540499 | 3.272888545 | 5.34-102516  | 165<br>6.4E <sup>-13</sup> | 17/27 | 25 |
| 52 |                                                      |             |        | 0.039 | 0.0012606 | 0.0041951 | 0.300503048 | 3.327753268 |              |                            |       |    |
| 53 | Hypoxia up-regulated protein 1                       | HYOU1_HUMAN | Q9Y4L1 | 0.029 | 0.0021725 | 0.0067587 | 0.321432887 | 3.111069342 | 5.16-111494  | 101<br>1.6E <sup>-06</sup> | 8/8   | 10 |
| 54 |                                                      |             |        | 0.039 | 0.0014627 | 0.0058263 | 0.25104775  | 3.983305971 |              |                            |       |    |
| 55 |                                                      |             |        | 0.015 | 0.0065333 | 0.0216408 | 0.301897653 | 3.312380835 |              |                            |       |    |
| 56 |                                                      |             |        | 0.009 | 0.0043338 | 0.0135865 | 0.318976634 | 3.135025874 |              |                            |       |    |
| 57 |                                                      |             |        | 0.001 | 0.0459592 | 0.0153109 | 3.001739505 | 0.333140167 |              |                            |       |    |
| 58 |                                                      |             |        | 0.048 | 0.001202  | 0.0048902 | 0.245797664 | 4.068386919 |              |                            |       |    |
| 59 | Eukaryotic translation initiation factor 3 subunit B | EIF3B_HUMAN | P55884 | 0.026 | 0.0161619 | 0.0323538 | 0.499537406 | 2.001852089 | 4.89-92823   | 153<br>1E <sup>-11</sup>   | 14/18 | 20 |
| 60 |                                                      |             |        | 0.040 | 0.0165049 | 0.0848576 | 0.194500986 | 5.141362117 |              |                            |       |    |
| 61 | Alpha-enolase                                        | ENOA_HUMAN  | P06733 | 0.007 | 0.0073665 | 0.0307339 | 0.23968621  | 4.172121541 | 7.01 - 47481 | 197                        | 15/20 | 32 |



|    |                                                             |             |        |       |           |           |             |             |              |                            |       |    |
|----|-------------------------------------------------------------|-------------|--------|-------|-----------|-----------|-------------|-------------|--------------|----------------------------|-------|----|
|    |                                                             |             |        |       |           |           |             |             |              | 4.1E <sup>-16</sup>        |       |    |
| 62 | Isocitrate dehydrogenase [NAD] subunit alpha. mitochondrial | IDH3A_HUMAN | P50213 | 0.004 | 0.0408057 | 0.0139044 | 2.934736121 | 0.340746138 | 6.47 - 40022 | 93<br>9.8E <sup>-06</sup>  | 7/12  | 19 |
| 63 | Ribose-phosphate pyrophosphokinase 1                        | PRPS1_HUMAN | P60891 | 0.001 | 0.0350293 | 0.0925712 | 0.378404227 | 2.642676614 | 6.51-35325   | 152<br>1.3E <sup>-11</sup> | 10/14 | 35 |
